# Supplementary material for: SirT3 suppresses hypoxia inducible factor 1α and tumor growth by inhibiting mitochondrial ROS production
Source: PubMed Central journal article supplement — Oncogene. 2011 Feb 28;30(26):2986–96. doi: 10.1038/onc.2011.37 (PMC3134877; doi:10.1038/onc.2011.37), 2011-02-28
Supplement: onc201137x1.pdf [file onc201137x1.pdf]

# Figure S1

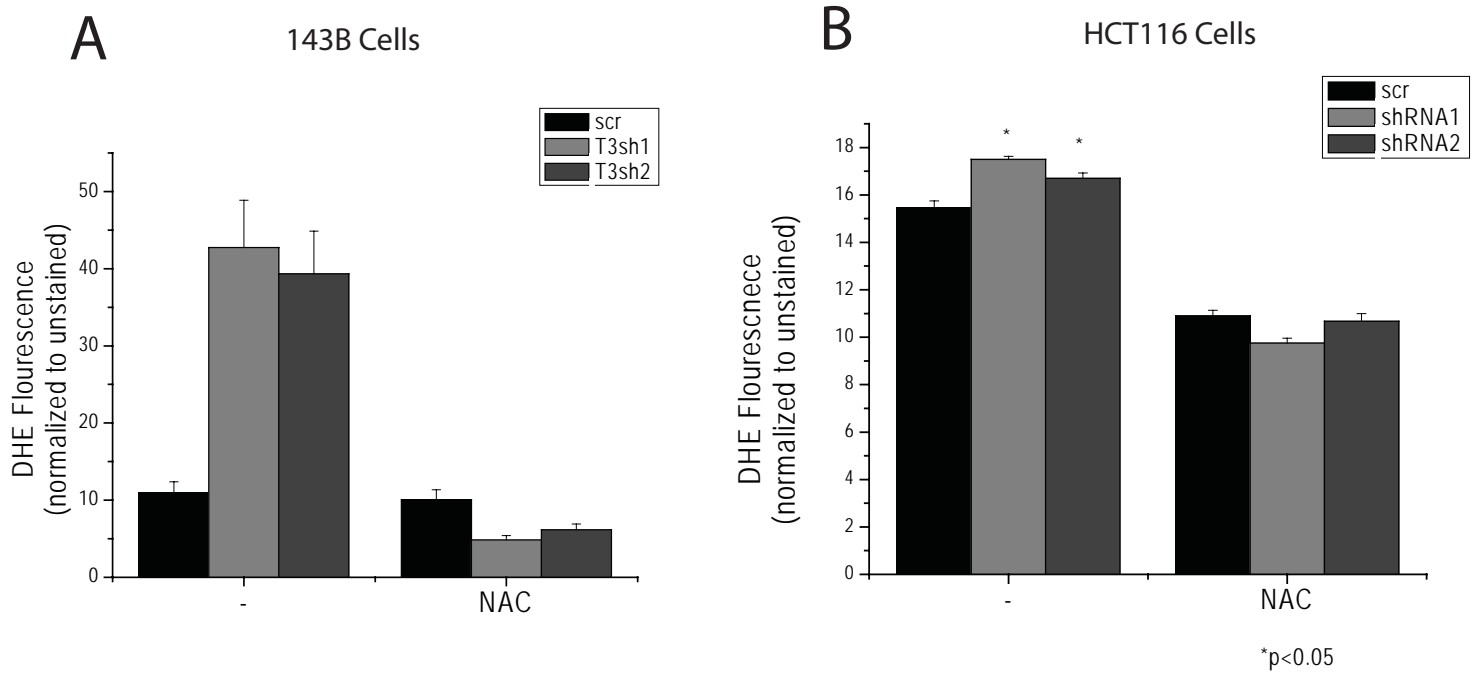

Figure S1. NAC attenuates the increase in ROS exhibited by 143B and HCT116 SirT3 knockdown cells.  $2 \times 10^5$  cells were plated into 24 well plates and preincubated with 10mM NAC for 24 hrs. 10uM DHE was added in phenol red free DMEM with or without NAC for 30 minutes. Cells were trypsinized and analyzed by flow cytometry. Error bars are SEM and \* indicates a p value <0.05.

# Figure S2

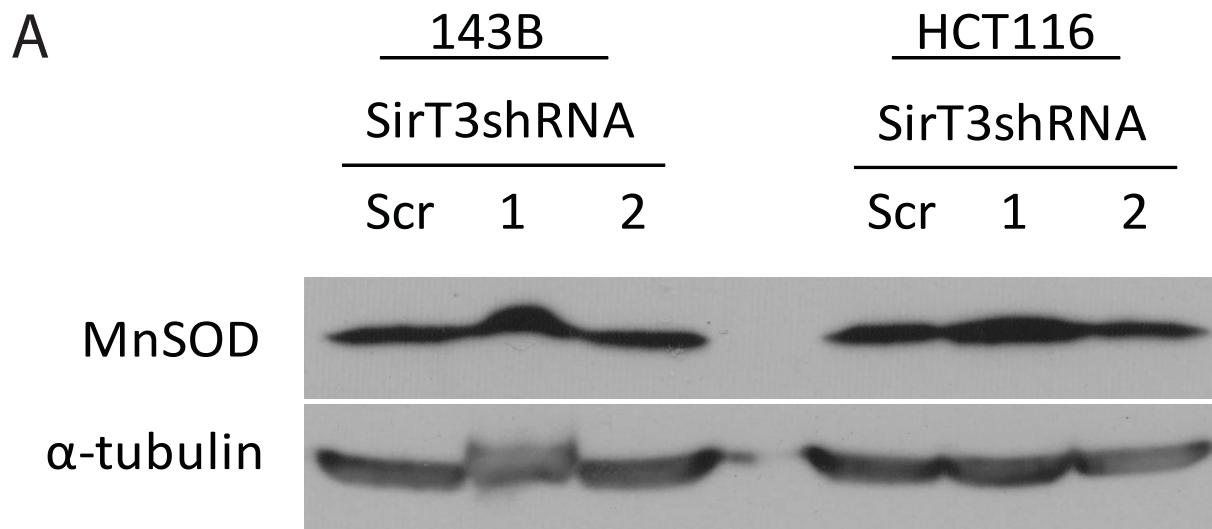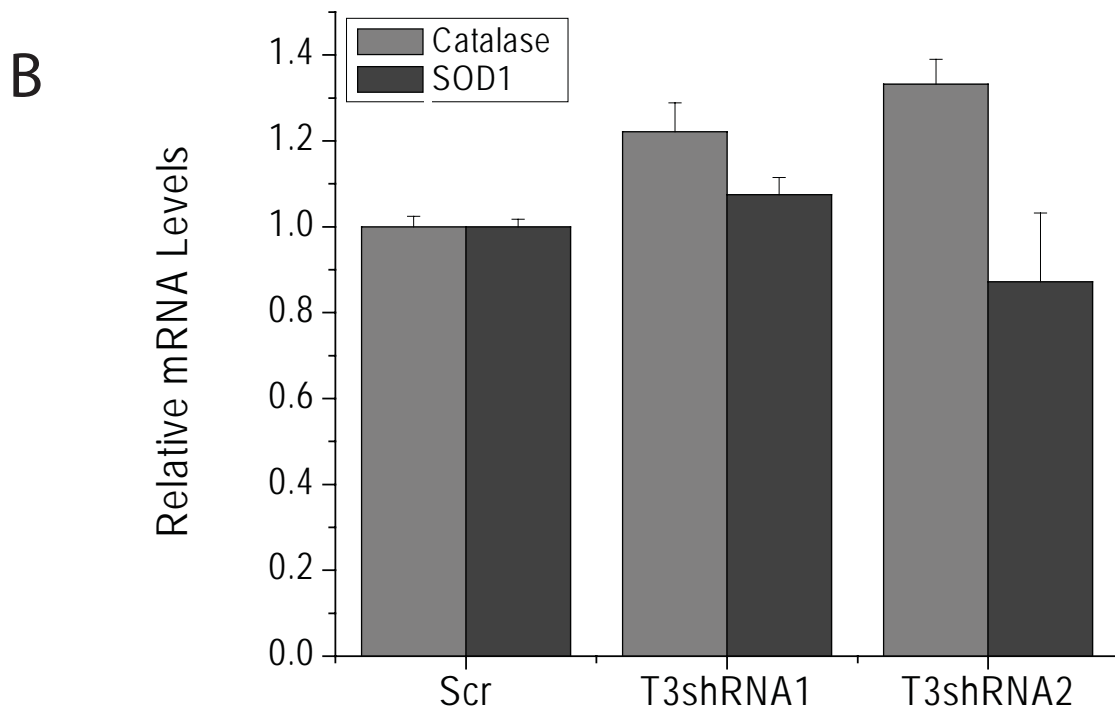

Figure S2. Antioxidant Levels are not changed in the absence of SirT3  
A. MnSOD is not increased in established human cancer cell lines in the absence of SirT3. Western blot analysis of whole cell lysates from 143B and HCT116 SirT3 shRNA stable cells. Tubulin is used as a loading control. B. Catalase and CuZnSOD (SOD1) mRNA are not changed in SirT3 knockdown cells. qPCR of cDNA generated from RNA isolated from 143B stable cells.

Figure S3

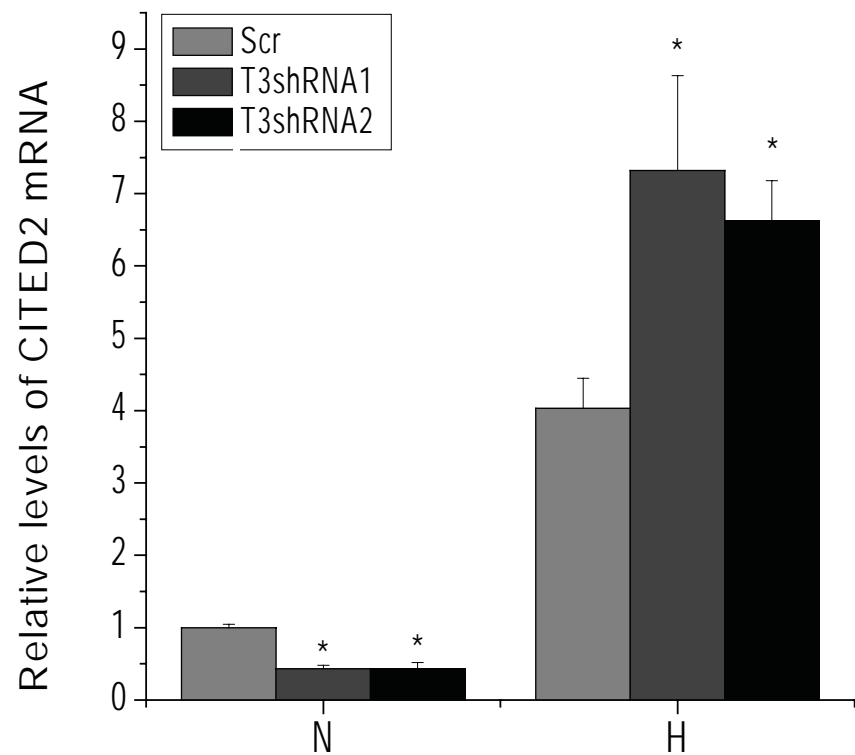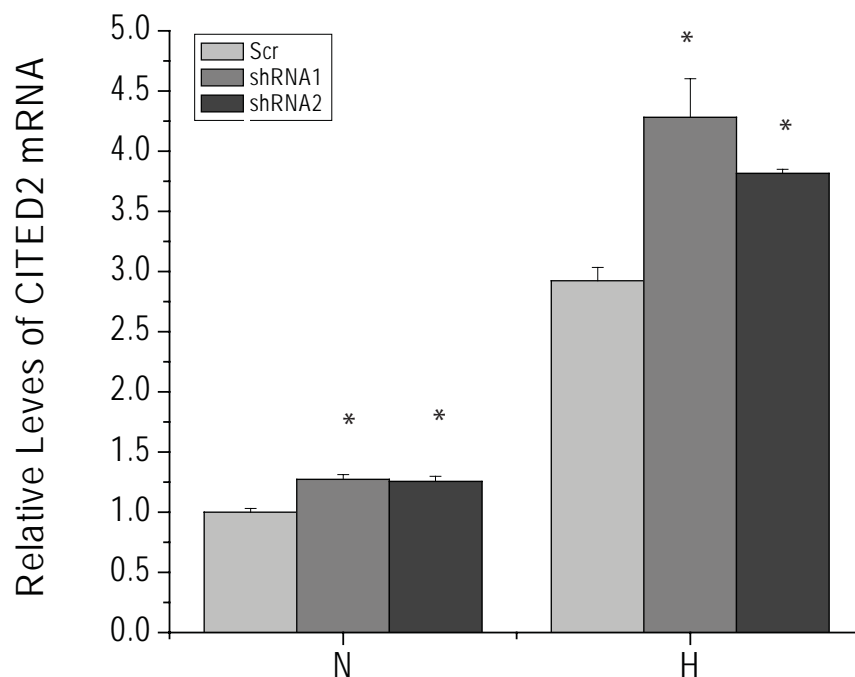

Figure S3. CITED2 mRNA is altered in the absence of SirT3. qPCR of cDNA generated from RNA isolated from 143B cells (top) and HCT116 cells (bottom) incubated in normoxic (21% oxygen) or hypoxic (1% oxygen).
